# Supplementary material for: Arsenic Toxicity-Induced Physiological and Metabolic Changes in the Shoots of Pteris cretica and Spinacia oleracea
Source: MDPI journal article supplement (doi:10.3390/plants10102009), 2021-09-25
Supplement: s1 [file s1]

**Table S2.** Effect of As treatment on selected free amino acid content in *Pteris cretica* and *Spinacia oleracea* shoots. Values represent mean  $\pm$  SE of three biological and four technical replicates per sample. Data with the same letter are not significantly different. Different letters indicate significant differences ( $p \leq 0.05$ ) among treatments according to the Kruskal-Wallis test. Abbreviations: control – 0 mg As/kg soil; As20 – 20 mg As/kg soil; As100 – 100 mg As/kg soil; Ala – free alanine; Glu – free glutamic acid; Pro – free proline; Gly – free glycine; Phe – free phenylalanine; Ser – free serine.

| Amino acid                    | <i>P. cretica</i>                 |                                    |                                   | <i>S. oleracea</i>                |                                    |                                   |
|-------------------------------|-----------------------------------|------------------------------------|-----------------------------------|-----------------------------------|------------------------------------|-----------------------------------|
|                               | control                           | As20                               | As100                             | control                           | As20                               | As100                             |
| Ala ( $\mu\text{mol/kg FW}$ ) | 633.17 $\pm$ 12.20 <sup>b</sup>   | 315.46 $\pm$ 4.46 <sup>ab</sup>    | 196.09 $\pm$ 3.94 <sup>a</sup>    | 145.95 $\pm$ 6.09 <sup>a</sup>    | 287.92 $\pm$ 10.22 <sup>ab</sup>   | 429.36 $\pm$ 6.27 <sup>b</sup>    |
| Glu ( $\mu\text{mol/kg FW}$ ) | 3448.24 $\pm$ 387.57 <sup>b</sup> | 2443.81 $\pm$ 245.28 <sup>ab</sup> | 1981.28 $\pm$ 158.82 <sup>a</sup> | 2160.81 $\pm$ 108.05 <sup>a</sup> | 2839.12 $\pm$ 278.71 <sup>ab</sup> | 3126.21 $\pm$ 109.71 <sup>b</sup> |
| Pro ( $\mu\text{mol/kg FW}$ ) | 482.88 $\pm$ 9.78 <sup>b</sup>    | 105.51 $\pm$ 1.52 <sup>ab</sup>    | 62.79 $\pm$ 1.25 <sup>a</sup>     | 160.09 $\pm$ 4.64 <sup>a</sup>    | 390.02 $\pm$ 9.43 <sup>b</sup>     | 149.94 $\pm$ 1.23 <sup>a</sup>    |
| Gly ( $\mu\text{mol/kg FW}$ ) | 132.77 $\pm$ 2.87 <sup>a</sup>    | 146.86 $\pm$ 2.12 <sup>a</sup>     | 514.79 $\pm$ 10.03 <sup>b</sup>   | 38.42 $\pm$ 1.45 <sup>a</sup>     | 55.95 $\pm$ 1.43 <sup>ab</sup>     | 75.41 $\pm$ 2.50 <sup>b</sup>     |
| Phe ( $\mu\text{mol/kg FW}$ ) | 957.24 $\pm$ 123.99 <sup>b</sup>  | 599.42 $\pm$ 16.38 <sup>b</sup>    | 417.97 $\pm$ 20.96 <sup>a</sup>   | 80.90 $\pm$ 3.73 <sup>b</sup>     | 84.25 $\pm$ 2.60 <sup>b</sup>      | 61.76 $\pm$ 1.13 <sup>a</sup>     |
| Ser ( $\mu\text{mol/kg FW}$ ) | 972.34 $\pm$ 26.48 <sup>b</sup>   | 582.44 $\pm$ 59.62 <sup>a</sup>    | 618.67 $\pm$ 34.02 <sup>a</sup>   | 612.42 $\pm$ 27.11 <sup>a</sup>   | 829.68 $\pm$ 81.35 <sup>a</sup>    | 698.39 $\pm$ 42.62 <sup>a</sup>   |
