# Supplementary material for: Arsenic Toxicity-Induced Physiological and Metabolic Changes in the Shoots of Pteris cretica and Spinacia oleracea
Source: MDPI journal article supplement (doi:10.3390/plants10102009), 2021-09-25
Supplement: s1 [file s1]

**Table S1.** Pearson's linear correlation (r) between As treatments and nutrient content in *Pteris cretica* and *Spinacia oleracea* shoots. n = 9 each treatment. \*  $p \leq 0.05$ , \*\*  $p \leq 0.01$ , \*\*\*  $p \leq 0.001$ , NS — not significant.

| As treatment | <i>P. cretica</i> - r | <i>S. oleracea</i> - r |
|--------------|-----------------------|------------------------|
| × N          | 0.92 ***              | 0.97 ***               |
| × Fe         | NS                    | NS                     |
| × Cu         | NS                    | −0.79 *                |
| × Ni         | 0.97 ***              | −0.88 **               |
| × Mn         | 0.77 *                | −0.69 *                |
| × Mg         | 0.93 ***              | −0.99 ***              |
| × Zn         | 0.95 ***              | −0.98 ***              |
| × S          | 0.97 ***              | 0.94 ***               |
| × P          | NS                    | −0.99 ***              |
